# Supplementary material for: The Accumulation of Phenyllactic Acid Impairs Host Glutamine Metabolism and Inhibits African Swine Fever Virus Replication: A Novel Target for the Development of Anti-ASFV Drugs
Source: Viruses. 2024 Mar 13;16(3):449. doi: 10.3390/v16030449 (PMC10975624; doi:10.3390/v16030449)
Supplement: Supplementary file 1 [file viruses-16-00449-s001.zip › viruses-2878493-supplementary.pdf]

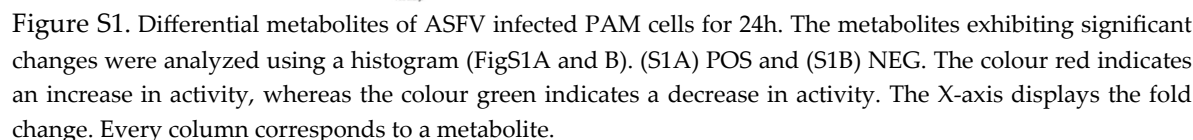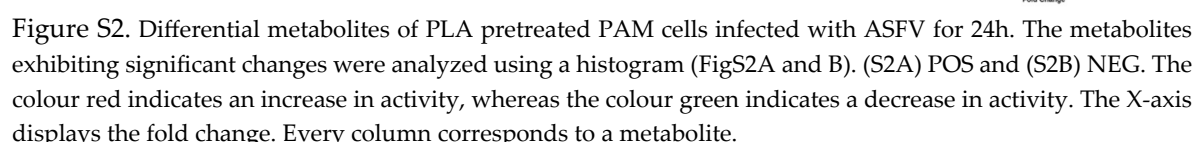

| Target gene | Primer sequence                |
|-------------|--------------------------------|
| ASFV-P72-F  | 5- CTGCTCATGGTATCAATCTTATCGA-3 |
| ASFV-P72-R  | 5- GATACCACAAGATCAGCCGT-3      |
| SLC1A5-F    | 5-CTGTTCCCTCCCGGGATTCT-3       |
| SLC1A5-R    | 5-TCCGAAAAGCTCCAGACGAC-3       |
| GLS1-F      | 5-TGTCATGGGCATGATGTGCT-3       |
| GLS1-R      | 5-AAGGAATGCCTTTGATCACCA-3      |
| GLUT2-F     | 5-CAGACAGCTGGAATCAGCCA-3       |
| GLUT2-R     | 5-CACAAGTCCCACCGACATGA-3       |
| GLUT4-F     | 5-GGCCATCGTCATTGGCATT-3        |
| GLUT4-R     | 5-GTCAGGCGCTTCAGACTCTT-3       |
| GAPDH-F     | 5-TCGGAGTGAACGGATTTGGC-3       |
| GAPDH-R     | 5-TGACAAGCTTCCCGTTCTCC-3       |

Table S1. Primers of target genes for qPCR detection.
